# Supplementary material
Source: Elsevier journal article supplement (https://cris.unibo.it/retrieve/32f969f0-1d8e-4386-b0a5-1f160fc5c9d0/mmc1.pdf)
Supplement: mmc1 [file mmc1.pdf]

1 **EJVES1865R\_REV2\_SUPPLEMENTARY MATERIAL (SECOND REVISION)**

2

3

4

5 **Supplementary Table S1: Full search strategy**

| PubMed                               | Scopus               | Cochrane Library                     | 6  |
|--------------------------------------|----------------------|--------------------------------------|----|
|                                      | (Endovascular repair | ( Endovascular repair OR             | 7  |
| (((((((endovascular                  | OR Endovascular      | Endovascular treatment*) :ti,ab,kw   | 8  |
| repair[Title/Abstract]) OR           | treatment*) AND      | AND ( fenestrated endograft* OR      | 9  |
| (endovascular                        | (fenestrated         | branched endograft*):ti,ab,kw AND    | 10 |
| treatment[Title/Abstract])) OR       | endograft* OR        | (aortic arch OR arch of the aorta OR | 11 |
| (total endovascular repair)) OR      | branched endograft*) | arch aneurysm* OR aortic arch        | 12 |
| (fenestrated endograft)) OR          | AND (aortic arch OR  | syndrome*): ti,ab,kw                 | 13 |
| (branched endograft)) OR (inner      | arch of the aorta OR |                                      | 14 |
| branch)) OR (chimney)) AND           | arch aneurysm* OR    |                                      | 15 |
| (((aortic arch[Title/Abstract]) OR   | aortic arch          |                                      | 16 |
| (arch of the aorta[Title/Abstract])) | syndrome*)           |                                      | 17 |
| OR (arch                             |                      |                                      | 18 |
| aneurysm[Title/Abstract])) OR        |                      |                                      | 19 |
| (aortic arch syndromes[MeSH          |                      |                                      |    |
| Terms]))                             |                      |                                      |    |

20

21

22

23

24

25

26

27 **Supplementary Table S2: Indication for aortic arch intervention**

| Authors et al        | n of patients | Degenerative Aneurysms N (%) | Chronic Dissections N (%) | PAU N (%)           | Pseudo-aneurysms N (%) | Other N (%)        | Urgent/Emergent cases N (%) |
|----------------------|---------------|------------------------------|---------------------------|---------------------|------------------------|--------------------|-----------------------------|
| Tsilimparis et al    | 108           | 49 (45.4)                    | 42 (38.9)                 | 17 (15.7)           | 0                      | 0                  | 16 (14.8)                   |
| Li et al             | 16            | 0                            | 16 (100)                  | 0                   | 0                      | 0                  | 0                           |
| Hanna et al          | 38            | 17 (44.7)                    | 13 (34.2)                 | 3 (7.9)             | 5 (13.2)               | 0                  | 1(3)                        |
| Dake et al           | 31            | 31 (100)                     | 0                         | 0                   | 0                      | 0                  | 0                           |
| Tenorio et al        | 39            | 14 (36)                      | 25 (64)                   | 0                   | 0                      | 0                  | 0                           |
| Planer               | 18            | -                            | -                         | -                   | -                      | -                  | 0                           |
| Kuzniar et al*       | 12            | 0                            | 12 (100)                  | 0                   | 0                      | 0                  | 0                           |
| Zhang et al          | 51            | 0                            | 51 (100)                  | 0                   | 0                      | 0                  | 0                           |
| Verscheure et al     | 70            | 0                            | 70 (100)                  | 0                   | 0                      | 0                  | 0                           |
| Kudo et al           | 28            | 22 (78.6)                    | 6 (21.4)                  | 0                   | 0                      | 0                  | 0                           |
| Sato et al           | 37            | 33 (89.2)                    | 4 (10.8)                  | 0                   | 0                      | 0                  | 0                           |
| Fernandez et al      | 14            | 1 (7.1)                      | 2 (14.3)                  | 8 (57.2)            | 1 (7.1)                | 2 (14.3)           | 0                           |
| van der Weijde et al | 11            | 8 (72.7)                     | 1 (9)                     | 0                   | 2 (18.2)               | 0                  | 0                           |
| Ferrer er al         | 24            | 13 (3)                       | 2 (8.3)                   | 9 (37.5)            | 0                      | 0                  | 0                           |
| Tsilimparis et al    | 54            | 24 (45)                      | 26 (48)                   | 4 (7)               | 0                      | 0                  | 11 (20)                     |
| Toya et al           | 8             | 3 (37.5)                     | 3 (37.5)                  | 0                   | 2 (25)                 | 0                  | 0                           |
| Law et al            | 5             | 0                            | 3 (60)                    | 0                   | 0                      | 2 (40)             | 2 (40)                      |
| Tan et al            | 7             | 4 (57.1)                     | 1 (14.3)                  | 0                   | 1(14.3)                | 1 (14.3)           | 0                           |
| <b>Total</b>         | <b>571</b>    | <b>219/553 (39.6)</b>        | <b>277/553 (50.1)</b>     | <b>41/553 (7.4)</b> | <b>11/553 (2)</b>      | <b>5/553 (0.9)</b> | <b>30/571 (5.3)</b>         |

28

29

30

31 Missing data are marked with -. Studies are presented in chronological order, from the latest to the oldest one

32 included in the Systematic Review.

33

34 \*This study reports a total of 13 interventions performed on 12 patients. The results are reported as number (N)

35 and percentage (%)

36 PAU: penetrating aortic ulcer

37

38

39

40 **Supplementary Table S3: Definitions adopted by authors of neurological events**  
 41 **(cerebrovascular events and spinal cord ischemia)**

| Study                    | Definition                                                                                                                                                                                                                                                                       | Reported outcomes                                                |
|--------------------------|----------------------------------------------------------------------------------------------------------------------------------------------------------------------------------------------------------------------------------------------------------------------------------|------------------------------------------------------------------|
| <b>Tsilimparis et al</b> |                                                                                                                                                                                                                                                                                  |                                                                  |
| Stroke                   | Society for Vascular Surgery reporting standards for TEVAR (2010)                                                                                                                                                                                                                | Minor and major strokes                                          |
| SCI                      | Society for Vascular Surgery reporting standards for TEVAR (2010)                                                                                                                                                                                                                | Transitory and permanent SCI                                     |
| <b>Li et al</b>          |                                                                                                                                                                                                                                                                                  |                                                                  |
| Stroke                   | Clinical presentation                                                                                                                                                                                                                                                            | Stroke                                                           |
| SCI                      | -                                                                                                                                                                                                                                                                                | -                                                                |
| <b>Hanna et al</b>       |                                                                                                                                                                                                                                                                                  |                                                                  |
| Stroke                   | Society for Vascular Surgery reporting standards for TEVAR (2010). Confirmed by a neurologist and imaging of the brain in accordance with Neurologic Academic Research Consortium reporting standards, with disability graded according to the modified Rankin Scale for stroke. | Disabling strokes (modified Rankin Scale <2 at 90-day follow up) |
| SCI                      | Society for Vascular Surgery reporting standards for TEVAR (2010). Confirmed by a neurologist and imaging of the cord and defined by Society for Vascular Surgery reporting guidelines for SCI                                                                                   | Transitory and permanent SCI                                     |
| <b>Dake et al</b>        |                                                                                                                                                                                                                                                                                  |                                                                  |
| Stroke                   | Clinical assessment with disability graded with the modified Rankin Scale at 1 months                                                                                                                                                                                            | Disabling strokes                                                |
| SCI                      | Clinical presentation of paraplegia                                                                                                                                                                                                                                              | Transitory and permanent SCI                                     |
| <b>Tenorio et al</b>     |                                                                                                                                                                                                                                                                                  |                                                                  |
| Stroke                   | Clinical presentation                                                                                                                                                                                                                                                            | Minor strokes/TIA and major strokes                              |
| SCI                      | Clinical presentation of paraplegia                                                                                                                                                                                                                                              | Transitory and permanent SCI                                     |
| <b>Planer et al</b>      |                                                                                                                                                                                                                                                                                  |                                                                  |
| Stroke                   | Clinical presentation. All serious adverse events were recorded and adjudicated by an independent Clinical Events Committee (CEC) according to the DEFINE group and the VARC-2 definitions                                                                                       | Disabling and non-disabling strokes                              |
| SCI                      | Clinical presentation of paraplegia. All serious adverse events were recorded and adjudicated by an independent Clinical Events Committee (CEC) according to the DEFINE group and the VARC-2 definitions                                                                         | Transitory and permanent SCI                                     |
| <b>Kuzniar et al</b>     |                                                                                                                                                                                                                                                                                  |                                                                  |
| Stroke                   | Clinical presentation                                                                                                                                                                                                                                                            | Transitory and permanent stroke                                  |
| SCI                      | Clinical presentation of paraplegia                                                                                                                                                                                                                                              | Transitory and permanent SCI                                     |
| <b>Zhang et al</b>       |                                                                                                                                                                                                                                                                                  |                                                                  |
| Stroke                   | NR                                                                                                                                                                                                                                                                               | NR                                                               |
| SCI                      | NR                                                                                                                                                                                                                                                                               | NR                                                               |
| <b>Verscheure et al</b>  |                                                                                                                                                                                                                                                                                  |                                                                  |
| Stroke                   | Society for Vascular Surgery reporting standards for TEVAR (2010)                                                                                                                                                                                                                | Minor and major strokes                                          |
| SCI                      | Society for Vascular Surgery reporting standards for TEVAR (2010)                                                                                                                                                                                                                | NR                                                               |
| <b>Kudo et al</b>        |                                                                                                                                                                                                                                                                                  |                                                                  |
| Stroke                   | Clinical presentation                                                                                                                                                                                                                                                            | Transient neurologic dysfunction and disabling stroke            |
| SCI                      | Clinical presentation of paraplegia                                                                                                                                                                                                                                              | Transient neurologic dysfunction and disabling stroke            |

|                             |                                                                                                                                             |                              |
|-----------------------------|---------------------------------------------------------------------------------------------------------------------------------------------|------------------------------|
| <b>Sato et al</b>           |                                                                                                                                             |                              |
| Stroke                      | NR                                                                                                                                          | NR                           |
| SCI                         | Clinical presentation of paraplegia                                                                                                         | Transitory and permanent SCI |
| <b>Fernandez et al</b>      |                                                                                                                                             |                              |
| Stroke                      | Clinical presentation                                                                                                                       | Minor and major strokes      |
| SCI                         | Clinical presentation of paraplegia                                                                                                         | Transitory and permanent SCI |
| <b>Van der Weijde et al</b> |                                                                                                                                             |                              |
| Stroke                      | Clinical presentation                                                                                                                       | Minor and major strokes      |
| SCI                         | Clinical presentation of paraplegia                                                                                                         | Transitory and permanent SCI |
| <b>Ferrer et al</b>         |                                                                                                                                             |                              |
| Stroke                      | Clinical presentation, with neurologic assessment carried out by a cardiovascular surgeon with a consulting neurologist called when needed. | TIA and major strokes.       |
| SCI                         | Clinical presentation of paraplegia, assessed by a cardiovascular surgeon, with a consulting neurologist called when needed.                | Transitory and permanent SCI |
| <b>Tsilimparis et al</b>    |                                                                                                                                             |                              |
| Stroke                      | Clinical presentation                                                                                                                       | Minor and major strokes      |
| SCI                         | Clinical presentation of paraplegia                                                                                                         | Transitory and permanent SCI |
| <b>Toya et al</b>           |                                                                                                                                             |                              |
| Stroke                      | -                                                                                                                                           | -                            |
| SCI                         | NR                                                                                                                                          | NR                           |
| <b>Law et al</b>            |                                                                                                                                             |                              |
| Stroke                      | Clinical presentation                                                                                                                       | Minor and major strokes      |
| SCI                         | Clinical presentation of paraplegia                                                                                                         | Transitory and permanent SCI |
| <b>Tan et al</b>            |                                                                                                                                             |                              |
| Stroke                      | Clinical presentation                                                                                                                       | Minor and major strokes      |
| SCI                         | Clinical presentation of paraplegia                                                                                                         | Transitory and permanent SCI |

42

43

44 Studies are presented in chronological order, from the latest to the oldest one included in the

45 Systematic Review.

46 SCI: spinal cord ischemia; TIA: transitory ischemic attack. NR: definition of the outcome *not*47 *reported* in the article; (-): outcome not investigated by in the article;

48
